# Supplementary material for: Chemoprevention Activity of Dipyridamole in the MMTV-PyMT Transgenic Mouse Model of Breast Cancer
Source: Oxford University Press journal article supplement (doi:10.1158/1940-6207.capr-12-0345), 2013-02-28
Supplement: 19406207capr120345-sup-tab1-6.pdf [file 19406207capr120345-sup-tab1-6.pdf]

**Table 1A. Genes enriched as over-expressed in DPM treatment group**

| Affy Probeset | Gene Name | mRNA Accession         | Gene Description                                                                                         | Fold Change |
|---------------|-----------|------------------------|----------------------------------------------------------------------------------------------------------|-------------|
| 10538247      | Npy       | NM_023456              | Mus musculus neuropeptide Y (Npy), mRNA.                                                                 | 2.0024      |
| 10598062      | ---       | NC_005089              | gi 34538597 ref NC_005089.1 :11546-11612, tRNA-His                                                       | 2.0562      |
| 10462618      | Ifit3     | NM_010501              | Mus musculus interferon-induced protein with tetratricopeptide repeats 3 (Ifit3), mRNA.                  | 2.0574      |
| 10598071      | ---       | NC_005089              | gi 34538597 ref NC_005089.1 :15289-15355, tRNA-Thr                                                       | 2.0601      |
| 10539263      | Loxl3     | NM_013586              | Mus musculus lysyl oxidase-like 3 (Loxl3), mRNA.                                                         | 2.0733      |
| 10381809      | Itgb3     | NM_016780              | Mus musculus integrin beta 3 (Itgb3), mRNA.                                                              | 2.0891      |
| 10566358      | Trim30    | NM_009099              | Mus musculus tripartite motif-containing 30 (Trim30), mRNA.                                              | 2.1749      |
| 10407327      | Emb       | NM_010330              | Mus musculus embigin (Emb), mRNA.                                                                        | 2.1802      |
| 10582888      | ---       | ENSMUST0000099042      | cdna:known chromosome:NCBIM37:9:3001070:3002330:1 gene:ENSMUSG00000074566                                | 2.1835      |
| 10400967      | Six1      | NM_009189              | Mus musculus sine oculis-related homeobox 1 homolog (Drosophila) (Six1), mRNA.                           | 2.1864      |
| 10467826      | Hpse2     | BC158131               | Mus musculus similar to Heparanase-2 (Hpa2), mRNA (cDNA clone MGC:190011 IMAGE:9088198), complete cds.   | 2.2208      |
| 10410931      | Vcan      | NM_00108129            | Mus musculus versican (Vcan), transcript variant 1, mRNA.                                                | 2.2243      |
| 10467766      | Loxl4     | BC053925               | Mus musculus cDNA clone IMAGE:6311688, partial cds.                                                      | 2.2390      |
| 10522919      | Smr2      | NM_021289              | Mus musculus submaxillary gland androgen regulated protein 2 (Smr2), mRNA.                               | 2.2531      |
| 10489429      | Wfdc5     | NM_145369              | Mus musculus WAP four-disulfide core domain 5 (Wfdc5), mRNA.                                             | 2.2985      |
| 10366546      | Cpm       | NM_027468              | Mus musculus carboxypeptidase M (Cpm), mRNA.                                                             | 2.3140      |
| 10552488      | Klk10     | NM_133712              | Mus musculus kallikrein related-peptidase 10 (Klk10), mRNA.                                              | 2.3985      |
| 10492355      | Mme       | NM_008604              | Mus musculus membrane metallo endopeptidase (Mme), mRNA.                                                 | 2.6674      |
| 10575211      | ---       | mmu-mir-140            | MI0000165 Mus musculus miR-140 stem-loop                                                                 | 2.8980      |
| 10522934      | Amtn      | ENSMUST0000073363      | Amelotin gene:ENSMUSG00000029282                                                                         | 3.6794      |
| 10513514      | Mup5      | NM_008649              | Mus musculus major urinary protein 5 (Mup5), mRNA.                                                       | 4.1283      |
| 10485357      | ---       | ENSMUST0000099683      | cdna:known chromosome:NCBIM37:2:98506704:98507458:-1 gene:ENSMUSG00000075014                             | 4.2577      |
| 10598064      | ---       | NC_005089 // NC_005089 | gi 34538597 ref NC_005089.1 :11613-11671, tRNA-Ser // gi 34538597 ref NC_005089.1 :11671-11741, tRNA-Leu | 4.3329      |
| 10421853      | Lect1     | NM_010701              | Mus musculus leukocyte cell derived chemotaxin 1 (Lect1), mRNA.                                          | 4.3854      |

**Table 1B. Genes enriched as under-expressed in DPM treatment group**

| <b>Affy Probeset</b> | <b>Gene Name</b> | <b>mRNA Accession</b> | <b>Gene Description</b>                                                                                                    | <b>Fold Change</b> |
|----------------------|------------------|-----------------------|----------------------------------------------------------------------------------------------------------------------------|--------------------|
| 10386683             | Slc47a1          | NM_026183             | solute carrier family 47, member 1 (Slc47a1).                                                                              | 0.3068             |
| 10477512             | BC018465         | NM_144890             | cDNA sequence BC018465 (BC018465).                                                                                         | 0.3103             |
| 10513512             | Mup1             | NM_001163011          | major urinary protein 1 (Mup1), transcript variant 1.                                                                      | 0.3276             |
| 10513497             | Mup2             | NM_001045550          | major urinary protein 2 (Mup2), transcript variant 2.                                                                      | 0.3402             |
| 10477495             | U46068           | NM_001012392          | cDNA sequence U46068 (U46068), transcript variant 1.                                                                       | 0.3657             |
| 10420362             | Gjb2             | NM_008125             | gap junction protein, beta 2 (Gjb2).                                                                                       | 0.3666             |
| 10513437             | Mup2             | NM_008647             | major urinary protein 2 (Mup2), transcript variant 1.                                                                      | 0.3910             |
| 10442115             | Vmn2r96          | NM_001104547          | vomer nasal 2, receptor 96 (Vmn2r96).                                                                                      | 0.4081             |
| 10513420             | Mup7             | NM_001134675          | predicted gene 12546 (Gm12546).                                                                                            | 0.4202             |
| 10410007             | Fbp1             | NM_019395             | fructose biphosphatase 1 (Fbp1).                                                                                           | 0.4296             |
| 10415081             | EG665955         | FJ556972              | endogenous virus Friend spleen focus-forming virus (SFFVp) cell-line DS19-sc9 envelope glycoprotein 52 mRNA, complete cds. | 0.4563             |
| 10569008             | Cox8b            | NM_007751             | cytochrome c oxidase, subunit VIIIb (Cox8b), nuclear gene encoding mitochondrial protein.                                  | 0.4682             |
| 10565609             | Thrsp            | NM_009381             | thyroid hormone responsive SPOT14 homolog (Rattus) (Thrsp).                                                                | 0.4769             |
| 10543017             | Pdk4             | NM_013743             | pyruvate dehydrogenase kinase, isoenzyme 4 (Pdk4).                                                                         | 0.4841             |

**Table 2A. Functional enrichment (based on GO Biological Process) of genes over-expressed in DPM treatment group using DAVID.**

| <b>Annotation Cluster 1</b> | <b>Enrichment Score: 4.4</b>            | <b>Count</b> | <b>P_Value</b> | <b>Benjamin<br/>i</b> |
|-----------------------------|-----------------------------------------|--------------|----------------|-----------------------|
| SP_PIR_KEYWORDS             | signal                                  | 43           | 8.7E-8         | 1.7E-5                |
| UP_SEQ_FEATURE              | signal peptide                          | 43           | 5.4E-7         | 2.6E-4                |
| SP_PIR_KEYWORDS             | glycoprotein                            | 42           | 3.9E-5         | 2.5E-3                |
| SP_PIR_KEYWORDS             | disulfide bond                          | 32           | 8.7E-5         | 4.2E-3                |
| UP_SEQ_FEATURE              | glycosylation site:N-linked (GlcNAc...) | 41           | 1.6E-4         | 3.7E-2                |
| UP_SEQ_FEATURE              | disulfide bond                          | 31           | 3.7E-4         | 5.8E-2                |
| <b>Annotation Cluster 2</b> | <b>Enrichment Score: 4.53</b>           | <b>Count</b> | <b>P_Value</b> | <b>Benjamin<br/>i</b> |
| GOTERM_CC_FAT               | extracellular region                    | 31           | 1.0E-6         | 1.6E-4                |
| SP_PIR_KEYWORDS             | Secreted                                | 24           | 2.0E-5         | 1.9E-3                |
| GOTERM_CC_FAT               | extracellular region part               | 15           | 1.2E-3         | 4.4E-2                |
| <b>Annotation Cluster 3</b> | <b>Enrichment Score: 3.47</b>           | <b>Count</b> | <b>P_Value</b> | <b>Benjamin<br/>i</b> |
| GOTERM_BP_FAT               | cell adhesion                           | 14           | 6.9E-5         | 5.1E-2                |
| GOTERM_BP_FAT               | biological adhesion                     | 14           | 7.1E-5         | 2.6E-2                |
| SP_PIR_KEYWORDS             | cell adhesion                           | 10           | 6.5E-4         | 2.5E-2                |
| INTERPRO                    | EGF-like region, conserved site         | 8            | 4.1E-3         | 2.9E-1                |

**Table 2B. Functional enrichment (based on GO Biological Process) of genes under-expressed in DPM treatment group using DAVID.**

| <b>Annotation Cluster 1</b> | <b>Enrichment Score: 4.4</b>            | <b>Count</b> | <b>P_Value</b> | <b>Benjamin<br/>i</b> |
|-----------------------------|-----------------------------------------|--------------|----------------|-----------------------|
| GOTERM_CC_FAT               | extracellular region                    | 27           | 1.3E-9         | 9.1E-8                |
| SP_PIR_KEYWORDS             | Secreted                                | 21           | 1.0E-7         | 1.6E-5                |
| SP_PIR_KEYWORDS             | signal                                  | 30           | 1.7E-7         | 1.3E-5                |
| UP_SEQ_FEATURE              | signal peptide                          | 30           | 1.1E-6         | 3.0E-4                |
| SP_PIR_KEYWORDS             | disulfide bond                          | 18           | 7.2E-3         | 1.6E-1                |
| UP_SEQ_FEATURE              | disulfide bond                          | 18           | 1.2E-2         | 8.0E-1                |
| SP_PIR_KEYWORDS             | glycoprotein                            | 21           | 3.3E-2         | 4.6E-1                |
| UP_SEQ_FEATURE              | glycosylation site:N-linked (GlcNAc...) | 20           | 8.9E-2         | 9.8E-1                |

**Table 3. Cell growth, proliferation and migration related functions of those genes differentially-enriched in the DPM treatment group**

| <b>Gene Function</b>                             | <b>Up-regulated Gene</b>                                                                                                  | <b>Down-regulated Gene</b> |
|--------------------------------------------------|---------------------------------------------------------------------------------------------------------------------------|----------------------------|
| <b>Cell adhesion</b>                             | Mme, Edil3, Lypd3, Amtn, Vcan, Ccdc80, Col11a1, Dsg3, Emb, Flrt3, Itgb4, Itgb3, Lgals3bp, Llg12, Pcdh9, Tubb2b, Tnc, Thbs | Cldn2, Dsc1                |
| <b>Negative regulation of cell proliferation</b> | H19, Npy                                                                                                                  |                            |
| <b>Apoptosis</b>                                 | Sap30bp, Casp1, Casp12, Casp1, Xaf1, Slc5a8                                                                               |                            |
| <b>Autophagy</b>                                 | Wipi1                                                                                                                     |                            |
| <b>Anti-angiogenesis</b>                         | <b>Lect1</b>                                                                                                              |                            |
| <b>MAPKKK cascade</b>                            | Gadd45b, Plce1, Prkca, Map3k3                                                                                             |                            |
| <b>Tumorigenesis</b>                             | <b>Klk10</b>                                                                                                              |                            |

*\* Bold font indicates gene validated by qPCR and by western blotting*

**Table 4. Comparison of gene expression fold changes between microarray and qPCR.**

| Up-regulated Gene from Microarray |                       |                          | Down-regulated Gene from Microarray |                       |                          |
|-----------------------------------|-----------------------|--------------------------|-------------------------------------|-----------------------|--------------------------|
| Gene Name                         | Fold Change (RT-qPCR) | Fold Change (microarray) | Gene Name                           | Fold Change (RT-qPCR) | Fold Change (microarray) |
| <b>Npy</b>                        | 9.5889                | 2.0024                   | <b>Slc47a1</b>                      | 1.8024                | 0.3068                   |
| <b>Ifit3</b>                      | 2.9347                | 2.0574                   | <b>BC018465</b>                     | 2.1201                | 0.3103                   |
| <b>Loxl3</b>                      | 4.7443                | 2.0733                   | <b>Mup1</b>                         | 13.4641               | 0.3276                   |
| <b>Itgb3</b>                      | 4.7117                | 2.0891                   | <b>Mup2 (transcript variant 2)</b>  | 4.1853                | 0.3402                   |
| <b>Trim30</b>                     | 1.3263                | 2.1749                   | <b>U46068</b>                       | 1.8993                | 0.3657                   |
| <b>Emb</b>                        | 3.7531                | 2.1802                   | <b>Gjb2</b>                         | 0.4993                | 0.3666                   |
| <b>Six1</b>                       | 14.4140               | 2.1864                   | <b>Mup2 (transcript variant 1)</b>  | 12.1766               | 0.3910                   |
| <b>Hpse2</b>                      | 7.0131                | 2.2208                   | <b>Vmn2r96</b>                      | 1.3226                | 0.4081                   |
| <b>Vcan</b>                       | 3.4556                | 2.2243                   | <b>Mup7</b>                         | 2.1216                | 0.4202                   |
| <b>Loxl4</b>                      | 1.4325                | 2.2390                   | <b>Fbp1</b>                         | 0.6392                | 0.4296                   |
| <b>Smr2</b>                       | 0.4123                | 2.2531                   | <b>EG665955</b>                     | 1.1455                | 0.4563                   |
| <b>Wfdc5</b>                      | 12.5628               | 2.2985                   | <b>Cox8b</b>                        | 0.3432                | 0.4682                   |
| <b>Cpm</b>                        | 3.6211                | 2.3140                   | <b>Thrsp</b>                        | 0.3835                | 0.4769                   |
| <b>Klk10</b>                      | 30.5677               | 2.3985                   | <b>Pdk4</b>                         | 0.6708                | 0.4841                   |
| <b>Mme</b>                        | 4.2186                | 2.6674                   |                                     |                       |                          |
| <b>Amtn</b>                       | 11.3662               | 3.6794                   |                                     |                       |                          |
| <b>Mup5</b>                       | 23.5264               | 4.1283                   |                                     |                       |                          |
| <b>Lect1</b>                      | 16.8956               | 4.3854                   |                                     |                       |                          |

**Table 5. Differentially expressed miRNAs in DPM treatment group**

| Affy Probeset          | Up-regulated       |                     | Affy Probeset           | Down-regulated     |                     |
|------------------------|--------------------|---------------------|-------------------------|--------------------|---------------------|
|                        | Fold Change (qPCR) | Fold Change (array) |                         | Fold Change (qPCR) | Fold Change (array) |
| mmu-miR-455-star_st    | N.D.               | 3.6571              | mmu-miR-322_st          | N.D.               | 0.6643              |
| v11_mmu-miR-685_st     | 1.4507             | 3.4884              | mmu-miR-148b_st         | N.D.               | 0.6547              |
| mmu-miR-140-star_st    | 59.0232            | 3.0054              | mmu-miR-139-5p_st       | N.D.               | 0.6491              |
| mmu-miR-1937b_st       | 1.7365             | 2.9470              | mmu-miR-181a-1-star_st  | N.D.               | 0.6445              |
| mmu-miR-140_st         | 4.71232            | 2.8451              | mmu-let-7d-star_st      | N.D.               | 0.6428              |
| v11_mmu-miR-699_st     | N.D.               | 2.6581              | mmu-miR-101b_st         | N.D.               | 0.6299              |
| mmu-miR-1937a_st       | 1.9141             | 2.6132              | mmu-miR-148a-star_st    | N.D.               | 0.6288              |
| mmu-miR-455_st         | 8.7503             | 2.6124              | mmu-miR-10b_st          | N.D.               | 0.6129              |
| mmu-miR-711_st         |                    | 2.5429              | mmu-miR-203_st          | 1.1972             | 0.6005              |
| mmu-miR-10a_st         | N.D. N.D.          | 2.3127              | mmu-miR-466b-3p_st      | N.D.               | 0.5953              |
| mmu-miR-1274a_st       | N.D.               | 2.0029              | mmu-miR-532-3p_st       | N.D.               | 0.5879              |
| hp_mmu-mir-465c-2_s_st | N.D.               | 1.9301              | mmu-miR-434-3p_st       | N.D.               | 0.5836              |
| mmu-miR-712_st         | N.D.               | 1.8635              | mmu-miR-466e-3p_st      | N.D.               | 0.5820              |
| mmu-miR-503_st         | N.D.               | 1.8343              | mmu-miR-98_st           | N.D.               | 0.5793              |
| mmu-miR-1931_st        | N.D.               | 1.7642              | mmu-miR-375_st          | N.D.               | 0.5412              |
| mmu-miR-298_st         | N.D.               | 1.7481              | mmu-miR-193_st          | N.D.               | 0.5407              |
| mmu-miR-1949_st        | 1.3557             | 1.7196              | mmu-miR-329_st          | N.D.               | 0.5405              |
| mmu-miR-1839-3p_st     | N.D.               | 1.6043              | mmu-miR-128_st          | N.D.               | 0.5375              |
| mmu-miR-2133_st        | N.D.               | 1.5995              | mmu-miR-1895_st         | N.D.               | 0.5295              |
| hp_mmu-mir-465c-1_s_st | N.D.               | 1.5710              | mmu-miR-148a_st         | 0.8957             | 0.5251              |
| mmu-miR-214_st         | 1.9402             | 1.5704              | mmu-miR-467e_st         | N.D.               | 0.5186              |
| mmu-miR-326_st         | N.D.               | 1.5668              | v11_mmu-miR-467a-str_st | N.D.               | 0.4786              |
| mmu-miR-351_st         | 3.3836             | 1.5661              | mmu-miR-15b_st          | 28.2102            | 0.4770              |
| mmu-miR-762_st         | 1.0757             | 1.5623              | mmu-miR-125a-5p_st      | 3.2956             | 0.4483              |
| mmu-miR-150_st         | N.D.               | 1.5286              | mmu-miR-374_st          | N.D.               | 0.2218              |
| mmu-miR-133a_st        | N.D.               | 1.5211              | mmu-miR-34c-star_st     | N.D.               | 0.1489              |
| mmu-miR-690_st         | 0.8865             | 1.5051              |                         | N.D.               |                     |

*N.D.* = not determined, or not detectable by qPCR
